# Supplementary material for: Predicting ambient aerosol thermal-optical reflectance (TOR) measurements from infrared spectra: organic carbon
Source: Copernicus journal article supplement (doi:10.5194/amt-8-1097-2015), 2015-03-05
Supplement: Supplementary file 1 [file amt-8-1097-2015-supplement.zip]

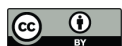

## *Supplement of*

# **Predicting ambient aerosol thermal-optical reflectance (TOR) measurements from infrared spectra: organic carbon**

**A. M. Dillner and S. Takahama**

*Correspondence to:* A. M. Dillner ([amdillner@ucdavis.edu](mailto:amdillner@ucdavis.edu))

- [amt-8-1097-2015-supplement-cover-letter.pdf](#)
- Supplemental Material
  - [Dillner Takahama FTIR TOR OC supplemental material\\_revised.pdf](#)
  - [Phoenix\\_collocated\\_samples.txt](#)
  - [TOR\\_collocated\\_samples.txt](#)
  - [full\\_table.txt](#)
